# Supplementary material for: Simulated annealing and density functional theoretical prediction of macrocyclic ligand conformations, protonation sites and complex metal–ligand exchange reaction directions
Source: Royal Society of Chemistry journal article supplement (doi:10.1039/c3dt32113d), 2013-01-01
Supplement: c3dt32113d.pdf [file c3dt32113d.pdf]

1 **Supplementary information:**

2 **I. Calculation of protonation constants of DO2A<sup>2-</sup> and ODO2A<sup>2-</sup> using the TC**  
 3 **method.**

4 Thermodynamic Cycle:

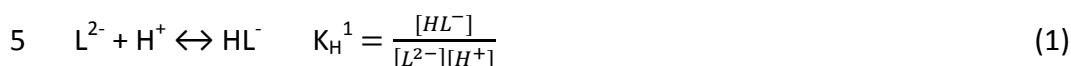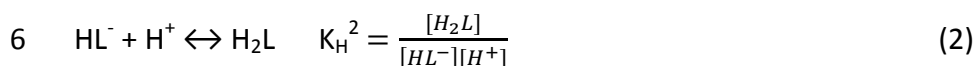

7  $L = DO2A^{2-}$  or  $ODO2A^{2-}$

8  $\Delta G_{gas} = \sum G_{gas}(products) - \sum G_{gas}(reactants)$  (3)

9  $\Delta \Delta G_{sol} = \sum \Delta G_{sol}(products) - \sum \Delta G_{sol}(reactants)$  (4)

10  $\Delta G_{aq} = \Delta G_{gas} + \Delta \Delta G_{sol}$  (5)

11  $\Delta G_{aq}^n = -RT \ln K_a^n \quad (n=1, 2)$  (6)

12

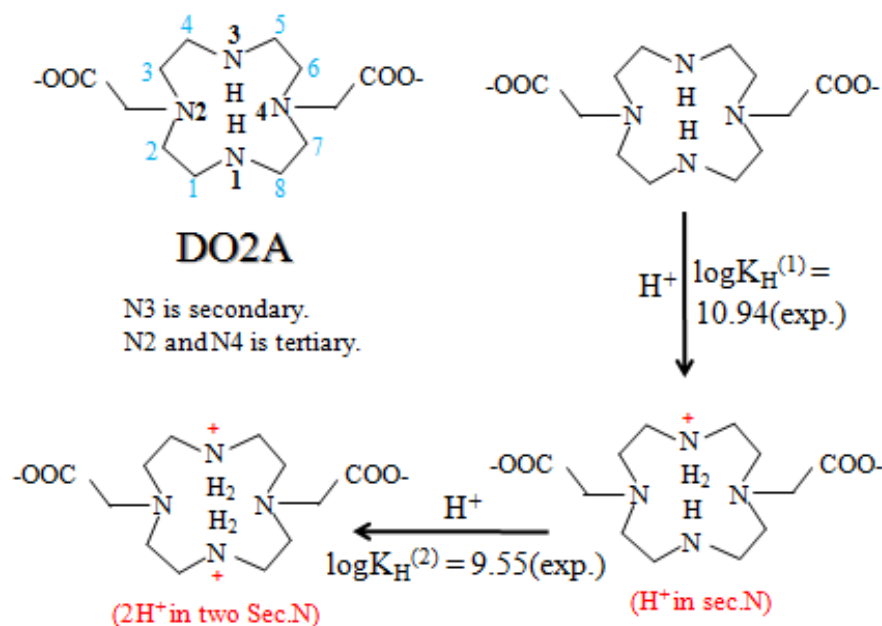

22 In Water:

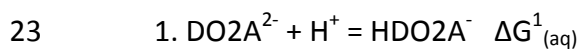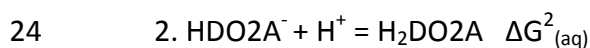

25  $\Delta G_{DO2A^1(aq)} = \Delta G_{gas}^1 + \Delta \Delta G_{sol}^1 = -2.303 \times RT \times \log K_H^1 = -2.303 \times 1.987 \times 298.1 \times \log K_H^1$

$$1 \quad \Delta G_{\text{DO2A}^{2-}(\text{aq})}^2 = \Delta G_{\text{gas}}^2 + \Delta \Delta G_{\text{sol}}^2 = -2.303 \times RT \times \log K_{\text{H}}^2 = -2.303 \times 1.987 \times 298.1 \times \log K_{\text{H}}^2$$

| species                 | $G_{\text{gas}}^a$ | $G_{\text{aq}}^a$ | $\Delta G_{\text{sol}}^b$ |
|-------------------------|--------------------|-------------------|---------------------------|
| $\text{DO2A}^{2-}$      | -990.096957        | -990.342199       | -153.89                   |
| $\text{HDO2A}^-$        | -990.726343        | -990.826212       | -62.67                    |
| $\text{H}_2\text{DO2A}$ | -991.266863        | -991.287563       | -12.99                    |

2 <sup>a</sup> In atomic unit, hartree (1 hartree = 627.5 kcal/mol). <sup>b</sup> In kcal/mol.

3 \*  $G_{\text{gas}}$  is the Gibbs free energy calculated by B3LYP/6-31G\* in gas phase,  $G_{\text{sol}}$  is the  
 4 Gibbs free energy calculated by B3LYP/6-31G\* in aqueous solution (PCM/UFF),  $\Delta G_{\text{sol}}$   
 5 =  $G_{\text{aq}} - G_{\text{gas}}$ .

6

$$7 \quad G_{\text{H}^+(\text{g})} = -6.28 \text{ kcal/mol} ; \Delta G_{\text{H}^+(\text{sol})} = -264.61 \text{ kcal/mol}$$

$$8 \quad \Delta G_{\text{gas}}^1 = G_{\text{HDO2A}^-(\text{g})} - G_{\text{DO2A}^{2-}(\text{g})} - G_{\text{H}^+(\text{g})} = -388.66 \text{ kcal/mol}$$

$$9 \quad \Delta \Delta G_{\text{sol}}^1 = \Delta G_{\text{HDO2A}^-(\text{sol})} - \Delta G_{\text{DO2A}^{2-}(\text{sol})} - \Delta G_{\text{H}^+(\text{sol})}$$

$$10 \quad = -62.67 + 153.89 + 264.61 = 355.83 \text{ kcal/mol}$$

$$11 \quad \Delta G_{(\text{aq})}^1 = -388.66 + 355.83 = -32.83 \text{ kcal/mol}$$

$$12 \quad \Delta G_{\text{DO2A}^{2-}(\text{aq})}^1 = \Delta G_{\text{gas}}^1 + \Delta \Delta G_{\text{sol}}^1 = -32.83 \text{ kcal/mol} = -2.303 \times 1.987 \times 298.1 \times \log K_{\text{H}}^1$$

$$13 \quad \log K_{\text{H}}^1 = 24.07 \text{ (cal.) v.s } \log K_{\text{H}}^1 = 10.94 \text{ (exp.)}$$

$$14 \quad \delta^1 = \log K_{\text{H}}^1(\text{cal.}) - \log K_{\text{H}}^1(\text{exp.}) = 13.13$$

15

$$16 \quad \Delta G_{\text{gas}}^2 = G_{\text{H}_2\text{DO2A}(\text{g})} - G_{\text{HDO2A}^-(\text{g})} - G_{\text{H}^+(\text{g})} = -332.90 \text{ kcal/mol}$$

$$17 \quad \Delta \Delta G_{\text{sol}}^2 = \Delta G_{\text{H}_2\text{DO2A}(\text{sol})} - \Delta G_{\text{HDO2A}^-(\text{sol})} - \Delta G_{\text{H}^+(\text{sol})}$$

$$18 \quad = -12.99 + 62.67 + 264.61 = 314.29 \text{ kcal/mol}$$

$$19 \quad \Delta G_{(\text{aq})}^2 = -332.90 + 314.29 = -18.61 \text{ kcal/mol}$$

$$20 \quad \Delta G_{\text{DO2A}^{2-}(\text{aq})}^2 = \Delta G_{\text{gas}}^2 + \Delta \Delta G_{\text{sol}}^2 = -18.61 \text{ kcal/mol} = -2.303 \times 1.987 \times 298.1 \times \log K_{\text{H}}^2$$

$$21 \quad \log K_{\text{H}}^2 = 13.64 \text{ (cal.) v.s } \log K_{\text{H}}^1 = 9.55 \text{ (exp.)}$$

$$22 \quad \delta^2 = \log K_{\text{H}}^2(\text{cal.}) - \log K_{\text{H}}^2(\text{exp.}) = 4.09$$

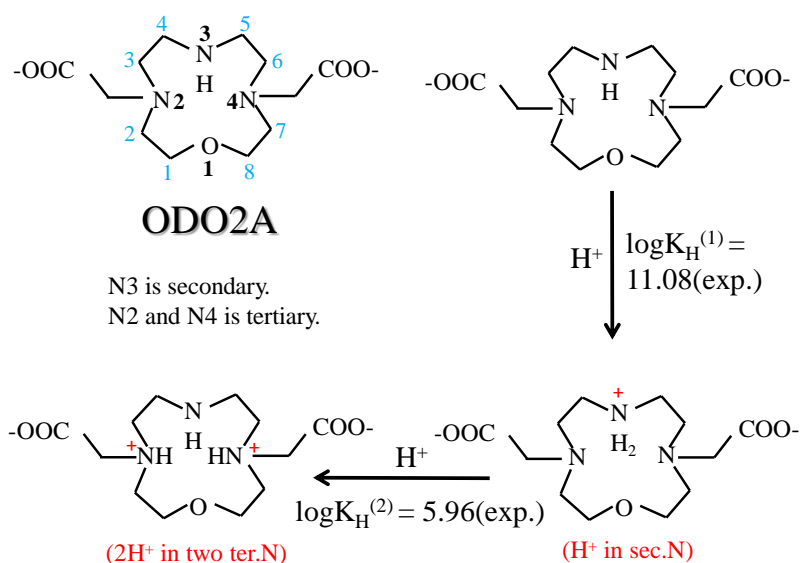

1

2 In Water:

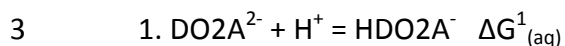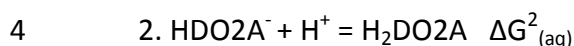

5  $\Delta G_{\text{ODO2A}^{2-}}^{1(\text{aq})} = \Delta G_{\text{gas}}^1 + \Delta \Delta G_{\text{sol}}^1 = -2.303 \times RT \times \log K_{\text{H}}^1 = -2.303 \times 1.987 \times 298.1 \times \log K_{\text{H}}^1$

6  $\Delta G_{\text{ODO2A}^{2-}}^{2(\text{aq})} = \Delta G_{\text{gas}}^2 + \Delta \Delta G_{\text{sol}}^2 = -2.303 \times RT \times \log K_{\text{H}}^2 = -2.303 \times 1.987 \times 298.1 \times \log K_{\text{H}}^2$

| species              | $G_{\text{gas}}^a$ | $G_{\text{aq}}^a$ | $\Delta G_{\text{sol}}^b$ |
|----------------------|--------------------|-------------------|---------------------------|
| ODO2A <sup>2-</sup>  | -1009.967321       | -1010.212968      | -154.14                   |
| HODO2A <sup>-</sup>  | -1010.619126       | -1010.711448      | -57.93                    |
| H <sub>2</sub> ODO2A | -1011.087590       | -1011.160575      | -45.80                    |

7 <sup>a</sup> In atomic unit, hartree (1 hartree = 627.5 kcal/mol). <sup>b</sup> In kcal/mol.

8 \*  $G_{\text{gas}}$  is the Gibbs free energy calculated by B3LYP/6-31G\* in gas phase,  $G_{\text{sol}}$  is

9 the Gibbs free energy calculated by B3LYP/6-31G\* in aqueous solution

10 (PCM/UFF),  $\Delta G_{\text{sol}} = G_{\text{aq}} - G_{\text{gas}}$ .

11

12  $G_{\text{H}^+(\text{g})} = -6.28 \text{ kcal/mole} ; \Delta G_{\text{H}^+(\text{sol})} = -264.61 \text{ kcal/mol}$

13  $\Delta G_{\text{gas}}^1 = G_{\text{HODO2A}^-(\text{g})} - G_{\text{ODO2A}^{2-}(\text{g})} - G_{\text{H}^+(\text{g})} = -402.73 \text{ kcal/mol}$

14  $\Delta \Delta G_{\text{sol}}^1 = \Delta G_{\text{HODO2A}^-(\text{sol})} - \Delta G_{\text{ODO2A}^{2-}(\text{sol})} - \Delta G_{\text{H}^+(\text{sol})}$

1 
$$= -57.93 + 154.14 + 264.61 = 360.82 \text{ kcal/mol}$$

2 
$$\Delta G_{(aq)}^1 = -402.73 + 360.82 = -41.91 \text{ kcal/mol}$$

3 
$$\Delta G_{(aq)}^1 = \Delta G_{gas}^1 + \Delta \Delta G_{sol}^1 = -41.91 \text{ kcal/mole} = -2.303 \times 1.987 \times 298.1 \times \log K_H^1$$

4 
$$\log K_H^1 = 30.72 \text{ (cal.) v.s } \log K_H^1 = 11.08 \text{ (exp.)}$$

5 
$$\delta^1 = \log K_H^1 \text{ (cal.)} - \log K_H^1 \text{ (exp.)} = 19.72$$

6

7 
$$\Delta G_{gas}^2 = G_{H_2ODO_2A(g)} - G_{HODO_2A-(g)} - G_{H+(g)} = -287.68 \text{ kcal/mol}$$

8 
$$\Delta \Delta G_{sol}^2 = \Delta G_{H_2ODO_2A(sol)} - \Delta G_{HODO_2A-(sol)} - \Delta G_{H+(sol)}$$

9 
$$= -45.80 + 57.93 + 264.61 = 276.74 \text{ kcal/mol}$$

10 
$$\Delta G_{(aq)}^2 = -287.68 + 276.74 = -10.94 \text{ kcal/mol}$$

11 
$$\Delta G_{(aq)}^2 = \Delta G_{gas}^2 + \Delta \Delta G_{sol}^2 = -10.94 \text{ kcal/mol} = -2.303 \times 1.987 \times 298.1 \times \log K_H^2$$

12 
$$\log K_H^2 = 8.02 \text{ (cal.) v.s } \log K_H^2 = 5.96 \text{ (exp.)}$$

13 
$$\delta^2 = \log K_H^2 \text{ (cal.)} - \log K_H^2 \text{ (exp.)} = 2.06$$

14 **TABLE S1:** Comparison of experimental ( $\log K_{H,exp}$ ) and calculated ( $\log K_{H,calc}$ )  
 15 protonation constants using the TC method. (All free energy in kcal/mol). (1-13)

| Reaction                        | $\Delta G_{aq}$ | $\Delta G_{gas}$ | $\Delta \Delta G_{sol}$ | $\log K_{H,exp}^a$ | $\log K_{H,calc}^b$ | $\delta$ |
|---------------------------------|-----------------|------------------|-------------------------|--------------------|---------------------|----------|
| $DO_2A^{2-} + H^+ = HDO_2A^-$   | -32.83          | -388.66          | 355.83                  | 10.94              | 24.07               | 13.13    |
| $HDO_2A^- + H^+ = H_2DO_2A$     | -18.61          | -332.90          | 314.29                  | 9.55               | 13.64               | 4.09     |
| $ODO_2A^{2-} + H^+ = HODO_2A^-$ | -41.91          | -402.73          | 360.82                  | 11.08              | 30.72               | 19.72    |
| $HODO_2A^- + H^+ = H_2ODO_2A$   | -10.94          | -287.68          | 276.74                  | 5.96               | 8.02                | 2.06     |

16 <sup>a</sup>Experimental protonation constants at 25°C. For  $DO_2A^{2-}$ , ref. 8a; for  $ODO_2A^{2-}$ , ref. 9.

17 <sup>b</sup>Thermodynamic cycle method was used by B3LYP/6-31G\* and PCM-UFF model for  
 18 Gibb's Free Energy.

19

20

1 **II. Calculation of protonation constants using the Isodesmic Reactions IRn**  
2 **method.**

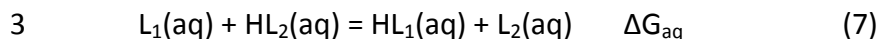

4  $L_{(2)}$  is the reference molecule

5 ✦ The main challenge associated with the use of isodesmic reaction is the  
6 selection of the appropriate reference molecule.

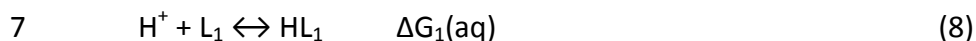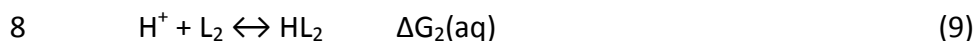

9  $\Delta G_1(aq)$  (planned to computed molecule)

10  $\Delta G_2(aq)$  (experimental value of the reference molecule)

11 \*Two molecules ( $L_1$  &  $L_2$ ) must be in the same ionic strength and temperature.

12

13  $\Delta G_1(aq) = G_{aq}(HL_1) - G_{aq}(H^+) - G_{aq}(L_1) \quad (10)$

14  $\Delta G_2(aq) = G_{aq}(HL_2) - G_{aq}(H^+) - G_{aq}(L_2) \quad (11)$

15  $\Delta G_{aq} = \Delta G_1(aq) - \Delta G_2(aq) = G_{aq}(HL_1) - G_{aq}(L_1) - G_{aq}(HL_2) + G_{aq}(L_2) \quad (12)$

16 ✦ Where the uncertainty related to  $G_{aq}(H^+)$  is no more applicable as this term  
17 cancels.

18  $L_1 = ODO_2A^{2-}$  ;  $L_2 = DO_2A^{2-}$  (as reference molecule)

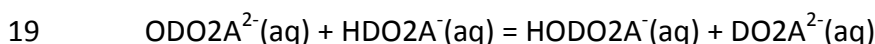

20  $\Delta G_{aq}^1 = \Delta G_{ODO_2A^{2-}}^1(aq) - \Delta G_{DO_2A^{2-}}^1(aq)$

21  $= G_{aq}(HODO_2A^-) - G_{aq}(ODO_2A^{2-}) - G_{aq}(HDO_2A^-) + G_{aq}(DO_2A^{2-})$

22 ✦  $\Delta G_{ODO_2A^{2-}}^1(aq) = \Delta G_{DO_2A^{2-}}^1(aq)$  (exp.)

23  $+ G_{aq}(HODO_2A^-) - G_{aq}(ODO_2A^{2-}) - G_{aq}(HDO_2A^-) + G_{aq}(DO_2A^{2-})$

24

25 Part 1:  $\Delta G_{DO_2A^{2-}}^1(aq) = -2.303 \times 1.987 \times 298.1 \times 10.94 = -14.92$  kcal/mol

26 Part 2:  $\Delta G_{aq} = G_{aq}(HODO_2A^-) - G_{aq}(ODO_2A^{2-}) - G_{aq}(HDO_2A^-) + G_{aq}(DO_2A^{2-})$

27  $= -1010.711448 + 1010.212968 + 990.826212 - 990.342199$

1 = - 0.014467 (a.u.) = - 9.08 kcal/mol

2  $\Delta G_{\text{ODO2A2}^{-1}(\text{aq})} = - 14.9235 - 9.0780 = -24.00 \text{ kcal/mol} = -$   
 3  $2.303 \times 1.987 \times 298.1 \times \log K_{\text{H}}^1$

4  $(\text{ODO2A}) \log K_{\text{H}}^1 = 17.59 \text{ (cal.)}$

5  $\Delta \delta^1 = \log K_{\text{H}}^1(\text{cal.}) - \log K_{\text{H}}^1(\text{exp.}) = 17.59 - 11.08 = 6.51$

6

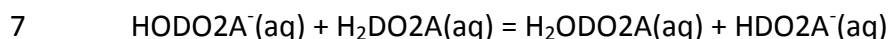

8  $\Delta G_{\text{aq}}^2 = \Delta G_{\text{ODO2A2}^{-2}(\text{aq})} - \Delta G_{\text{DO2A2}^{-2}(\text{aq})}$

9  $= G_{\text{aq}}(\text{H}_2\text{ODO2A}) - G_{\text{aq}}(\text{HODO2A}^{-}) - G_{\text{aq}}(\text{H}_2\text{DO2A}) + G_{\text{aq}}(\text{HDO2A}^{-})$

10  $\star \Delta G_{\text{ODO2A}^2(\text{aq})} = \Delta G_{\text{DO2A}^2(\text{aq})}(\text{exp.})$

11  $+ G_{\text{aq}}(\text{H}_2\text{ODO2A}) - G_{\text{aq}}(\text{HODO2A}^{-}) - G_{\text{aq}}(\text{H}_2\text{DO2A}) + G_{\text{aq}}(\text{HDO2A}^{-})$

12

13 Part 1:  $\Delta G_{\text{DO2A}^2(\text{aq})} = -2.303 \times 1.987 \times 298.1 \times 9.55 = - 13.03 \text{ kcal/mol}$

14 Part 2:  $\Delta G_{\text{aq}} = G_{\text{aq}}(\text{H}_2\text{ODO2A}) - G_{\text{aq}}(\text{HODO2A}^{-}) - G_{\text{aq}}(\text{H}_2\text{DO2A}) + G_{\text{aq}}(\text{HDO2A}^{-})$

15  $= -1011.160575 + 1010.711448 + 991.287563 - 990.826212$

16  $= 0.012224 \text{ (a.u.)} = 7.6706 \text{ kcal/mol}$

17  $\Delta G_{\text{ODO2A}^2(\text{aq})} = - 13.0274 + 7.6706 = - 5.36 \text{ kcal/mol} = -2.303 \times 1.987 \times 298.1 \times \log K_{\text{H}}^2$

18  $(\text{ODO2A}^{2-}) \log K_{\text{H}}^2 = 3.93 \text{ (cal.)}$

19  $\Delta \delta^2 = \log K_{\text{H}}(\text{cal.}) - \log K_{\text{H}}(\text{exp.}) = 3.93 - 5.96 = -2.03$

20

21 **III. Calculation of  $\Delta \log K = \log K_{\text{f},\text{YDO2A}} - \log K_{\text{f},\text{YODO2A}}$  values:**

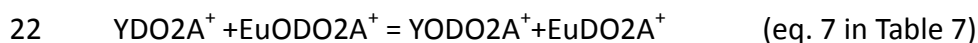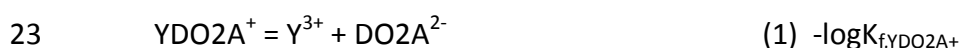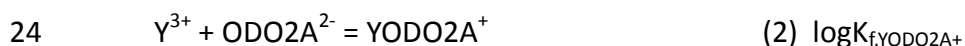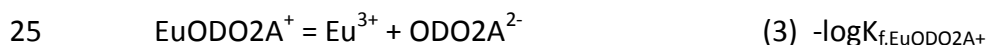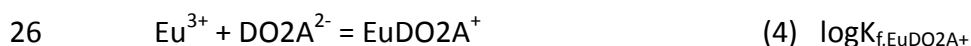

1 (1)+(2)+(3)+(4) :  $\Delta G = -2.303 \times RT \log K_f$

2  $\Delta G = -2.303RT(\log K_{f, YODO2A+} - \log K_{f, YDO2A+} + \log K_{f, EuDO2A+} - \log K_{f, EuODO2A+})$

3  $0.02 \times 1000 = -2.303 \times 1.987 \times 298.15(\log K_{f, YODO2A+} - \log K_{f, YDO2A+} + 12.99 - 12.27)$

4  $\Delta \log K_f = \log K_{f, YDO2A+} - \log K_{f, YODO2A+} = +0.71$
